# Supplementary material
Source: publisher figshare collection journal article supplement (https://gsapubs.figshare.com/ndownloader/files/26909981)
Supplement: Supplementary file 1 [file 26909981]

## Sheet: Sheet1
Compilation of Bedrock and Detrital Zircon Lu-Hf data
short	sample	grain	zircon	zircon	zircon	zircon
citation	name	type	U-Pb age	age error	εHf(T)	εHf error
Willner et al., 2008
	06ch53b-6	detrital	289	6	-1.18714	0.927587
	06ch53a-6	detrital	290	6	0.639752	1.00097
	06ch53a-2	detrital	297	7	0.122787	0.770757
	06ch53b-7	detrital	299	6	-0.607264	0.788017
	06ch53b-8	detrital	302	6	0.0492875	1.30736
	06ch53b-1	detrital	305	7	0.0184624	0.92055
	06ch54-6	detrital	308	9	-2.54035	0.858471
	06ch53a-3	detrital	311	6	-0.369867	0.900031
	06ch52a-5	detrital	315	6	2.58664	0.86222
	06ch53a-4	detrital	319	6	-3.05001	0.869863
	06ch52a-29	detrital	323	6	3.62384	1.10831
	06ch52a-27	detrital	326	7	3.33075	0.870846
	06ch52a-11	detrital	326	6	2.64672	1.09747
	06ch54-94	detrital	331	9	4.0604	0.803668
	06ch54-5	detrital	334	7	-3.17051	0.778277
	06ch54-37	detrital	335	9	-3.06328	0.894273
	06ch54-48	detrital	335	10	0.299184	0.834193
	06ch52a-29b	detrital	336	6	2.89565	0.867058
	06ch54-16	detrital	339	8	-1.80316	0.927591
	06ch53a-1a	detrital	340	8	1.38737	0.906607
	06ch54-19	detrital	414	12	-1.90868	0.798591
	02ch38-47	detrital	468	9	-3.89886	0.913694
	06ch54-98	detrital	469	14	-4.18159	0.798501
	06ch54-2	detrital	470	12	-4.80037	0.820023
	02ch38-28	detrital	473	10	-5.35884	0.837645
	02ch38-53	detrital	485.168	11.2194	-17.2158	0.984409
	02ch38-3	detrital	493.074	10.8236	-4.83469	0.805306
	02ch38-23II	detrital	500.326	11.6353	-0.874871	0.814206
	02ch38-15	detrital	510.516	8	-3.03412	0.842927
	06ch54-87	detrital	525	11	-4.04847	0.799698
	02ch38-35	detrital	529.05	13	-4.16262	0.931551
Ortamendi et al., 2017
	VFN049-93	detrital	551.3	27.3	-5.1
	VFN049-10	detrital	505.7	18.6	-2.1
	VFN049-75	detrital	490.5	12.4	0.5
	VFN049-16	detrital	503.9	25.9	-3.4
	VFN049-24	detrital	515.6	9	-3.2
	VFN049-47	detrital	539.4	29.8	-5.6
	VFN049-30	detrital	530.1	23.3	-5.8
	VFN049-50	detrital	547.3	24.5	-5.9
Pepper et al., 2016
	RCONCH01 10	detrital	15.6011		2.36484	1.08462
	RCONCH01 26	detrital	22.4469		1.50343	1.44674
	RCONCH01 108	detrital	51.6199		8.63641	1.54784
	RCONCH01 42	detrital	57.1341		6.96623	1.17787
	RCONCH01 20	detrital	64.7373		7.042	1.32111
	RCONCH01 74	detrital	66.176		6.10163	1.58019
	RCONCH01 28	detrital	67.6894		9.06291	1.31161
	RCONCH01 100	detrital	91.2396		10.5151	1.09586
	RCONCH01 73	detrital	91.5648		9.89109	1.01658
	RCONCH01 8	detrital	145.521		-1.80971	1.11007
	RCONCH01 30	detrital	243.364		-1.40475	1.25034
	RCONCH01 92	detrital	286.461		0.475777	1.1036
	RCONCH01 9	detrital	286.529		0.978357	1.53689
	RCONCH01 71	detrital	287.131		1.5314	1.79488
	RCONCH01 7	detrital	289.835		4.9815	1.42676
	RCONCH01 4	detrital	292.436		0.71236	1.05969
	RCONCH01 98	detrital	297.003		-2.60268	1.31824
	RCHOCH01 - 92	detrital	149.797		6.00911	1.15554
	RCHOCH01 - 35	detrital	151.285		5.38268	1.43332
	RCHOCH01 - 67	detrital	152.143		8.28527	1.24345
	RCHOCH01 - 15	detrital	168.303		2.98692	1.44459
	RCHOCH01 - 43	detrital	171.33		13.8567	1.3138
	RCHOCH01 - 32	detrital	173.991		5.64353	1.21128
	RCHOCH01 - 36	detrital	175.268		9.44393	1.79186
	RCHOCH01 - 9	detrital	288.194		1.56371	1.43209
	RCHOCH01 - 50	detrital	297.091		-1.13934	1.38169
	BVILCH01 104	detrital	22.2846		2.93695	1.13092
	BVILCH01 4	detrital	90.9638		10.2789	1.09567
	BVILCH01 80	detrital	92.29		8.10849	1.09553
	BVILCH01 60	detrital	95.8138		12.0282	1.19703
	BVILCH01 32	detrital	97.3639		8.48022	1.21114
	BVILCH01 39	detrital	99.4091		8.16518	1.29743
	BVILCH01 58	detrital	104.083		5.36616	1.41298
	BVILCH01 56	detrital	104.868		8.9771	1.02278
	BVILCH01 100	detrital	109.238		8.15992	1.32793
	BVILCH01 10	detrital	111.305		9.20696	1.40913
	BVILCH01 31	detrital	161.298		3.71589	1.22223
	BVILCH01 1	detrital	161.849		4.9227	1.41729
	BVILCH01 61	detrital	165.501		4.95142	1.39051
	BVILCH01 57	detrital	166.313		9.06366	1.38173
	BVILCH01 15	detrital	168.38		7.42552	1.23194
	BVILCH01 33	detrital	213.039		-1.37681	1.01111
	BVILCH01 59	detrital	309.098		-0.621395	1.34082
	BVILCH01 9	detrital	404.773		-5.47421	1.54687
Dahlquist et al., 2013
	ANC-11030a	averaged bedrock	466		-3.3	1.5
	FAM-7086	averaged bedrock	489		-14.2	2.2
	SVF-577	averaged bedrock	464		-5.7	1.7
	VMA-1018	averaged bedrock	476		-7.3	1.8
	DAL-1	averaged bedrock	372		-3.6	1.5
	NPE-14	averaged bedrock	369		-5.9	1.6
	ACH-140	averaged bedrock	366		-3.8	1.5
	NPE-10	averaged bedrock	369		-3.6	1.5
	FIA-17	averaged bedrock	322		-5	1.6
	HUA-12	averaged bedrock	357		-3.3	1.5
	CHI-17	averaged bedrock	345		-6.7	1.7
	FAM-177	averaged bedrock	353		2.6	1.1
	ZAP-33	averaged bedrock	340		-5.8	1.6
	VEL-6017	averaged bedrock	340		-5.4	1.6
	VEL-6017b	averaged bedrock	340		-0.2	1.3
Herve et al., 2014
	FO 06 96	bedrock	292.719	3.0903	-0.30436	0.667268
		bedrock	296.3	3.46543	-1.91412	0.505852
		bedrock	292.309	3.53951	-1.03263	0.564935
		bedrock	294.415	3.75392	-2.33645	0.482388
		bedrock	286.978	4.08317	-2.83997	0.580271
		bedrock	295.336	7.28685	-2.14043	0.586159
		bedrock	457.117	4.76986	1.41017	0.646064
		bedrock	285.929	3.55779	-2.27175	0.430268
		bedrock	290.479	3.05209	0.120591	0.639467
		bedrock	288.126	3.15659	-0.265213	0.800233
		bedrock	294.623	5.15382	-1.53117	0.547294
		bedrock	288.079	3.12174	-0.248769	0.794393
		bedrock	271.501	2.97087	-2.33968	0.42735
		bedrock	289.956	3.5898	-1.67044	0.547933
		bedrock	295.235	3.14449	-1.14557	0.503907
		bedrock	295.476	4.34882	0.186728	0.735326
	FO 06 98	bedrock	292.724	3.04882	-3.13586	0.580468
		bedrock	292.271	3.7408	-1.99493	0.531047
		bedrock	271.309	3.75714	0.90125	0.807393
		bedrock	292.767	2.9976	-1.98736	0.415805
		bedrock	293.663	3.35957	-2.35052	0.605102
		bedrock	303.612	3.59733	-2.31013	0.535387
		bedrock	289.953	3.03451	-1.75554	0.378475
		bedrock	302.203	3.96772	-0.819913	0.56005
		bedrock	286.572	2.99588	-2.68134	0.557246
		bedrock	287.531	2.90497	-4.46315	0.359972
		bedrock	297.951	3.16925	-3.6964	0.37525
		bedrock	301.745	3.89351	-1.83582	0.466431
		bedrock	286.164	3.46433	-2.93328	0.421655
		bedrock	283.015	2.87486	-1.39977	0.477823
		bedrock	291.399	4.14778	-3.37619	0.533306
		bedrock	303.821	3.12096	-3.40553	0.33376
		bedrock	287.807	3.36734	-2.44508	0.467215
		bedrock	285.021	3.56023	-4.18045	0.392814
		bedrock	275.355	4.37086	-5.27422	0.582764
		bedrock	291.175	3.0756	-1.75811	0.513627
		bedrock	316.329	3.37624	-1.5649	0.502003
		bedrock	272.048	2.93103	-4.37388	0.386648
		bedrock	267.816	3.81513	-3.51894	0.393244
	FO 06 94	bedrock	284.905	3.1559	0.250666	0.700508
		bedrock	285.459	3.24421	-1.54278	0.447603
		bedrock	287.576	3.35577	-0.217038	0.43196
		bedrock	290.983	3.005	-1.32053	0.589209
		bedrock	288.374	3.24877	-0.510853	0.706371
		bedrock	283.054	2.97687	-0.879062	0.451751
		bedrock	286.239	3.30219	-1.36712	0.446446
		bedrock	289.741	3.08182	-1.2964	0.386219
		bedrock	291.092	3.25579	-1.53418	0.499594
		bedrock	290.763	3.14758	-2.68878	0.443253
		bedrock	286.738	2.94765	-1.54218	0.37954
		bedrock	290.048	3.11352	-1.20826	0.508452
		bedrock	291.213	3.26997	-2.49147	0.395361
		bedrock	293.428	3.17114	-1.3307	0.388623
		bedrock	286.627	3.4973	-2.36029	0.456789
		bedrock	284.926	3.08895	-1.78248	0.482812
		bedrock	288.778	3.17236	-2.06966	0.442938
	FO 06 87	bedrock	254.382	2.59274	1.19786	0.560653
		bedrock	223.688	2.2622	2.86108	0.795792
		bedrock	253.75	2.59229	1.07489	0.467222
		bedrock	256.861	2.80321	1.29429	0.535606
		bedrock	256.122	2.60479	1.81151	0.584185
		bedrock	255.301	2.59827	1.67193	0.577948
		bedrock	254.575	2.59819	2.62816	0.580933
		bedrock	259.43	2.72114	0.499805	0.776248
		bedrock	258.461	2.63362	1.51513	0.492096
		bedrock	251.015	2.54521	1.31567	0.561795
		bedrock	257.648	2.60381	1.81537	0.676868
		bedrock	248.816	2.51864	2.75583	0.786879
		bedrock	254.398	2.60277	3.26656	0.842662
		bedrock	255.793	2.58737	2.63752	0.583838
		bedrock	212.373	2.15756	2.81467	0.765955
		bedrock	251.731	2.56604	2.19669	0.702505
		bedrock	253.66	2.58642	3.40489	0.560681
		bedrock	256.132	2.63524	3.59842	0.652216
	FO 06 89	bedrock	226.403	4.18411	3.51546	0.544614
		bedrock	222.219	3.94365	4.52718	0.720707
		bedrock	224.89	3.36852	5.57629	0.74876
		bedrock	218.819	3.6991	6.96976	1.10259
		bedrock	232.494	3.18877	5.90018	0.885885
		bedrock	222.899	3.4007	6.40223	0.962965
		bedrock	224.078	3.84778	4.35111	0.746361
		bedrock	226.726	3.16352	6.17571	0.58372
		bedrock	231.644	3.42751	4.84657	0.800062
		bedrock	227.612	3.22272	5.41475	1.31033
		bedrock	236.314	2.74207	1.52987	0.717034
		bedrock	223.307	5.02926	2.82489	0.703027
		bedrock	227.906	5.88569	2.81044	0.958525
		bedrock	224.943	3.31494	6.31216	0.99345
		bedrock	231.378	2.94167	4.19483	0.588867
		bedrock	226.516	2.61544	6.82627	1.12019
		bedrock	221.654	3.38418	5.28289	1.15021
		bedrock	222.454	3.33953	4.88136	0.672914
	FO 06 95	bedrock	221.116	2.89098	8.09667	0.934243
		bedrock	220.347	2.42458	4.62701	1.4797
		bedrock	225.514	2.64493	4.74395	1.06229
		bedrock	227.758	3.08238	9.2626	2.48439
		bedrock	223.304	2.4219	3.62852	0.768653
		bedrock	220.848	3.25508	3.5768	0.768648
		bedrock	216.782	2.47566	2.6197	0.833618
		bedrock	219.772	2.68533	1.84773	1.11748
		bedrock	202.142	4.56857	4.57992	0.52206
		bedrock	220.849	2.88713	5.92949	0.943281
		bedrock	220.653	2.57541	5.01763	0.704087
		bedrock	227.121	2.8392	6.43612	0.963495
		bedrock	220.214	2.63764	4.65269	1.55954
		bedrock	226.196	2.91467	2.74758	0.674158
	FO 06 97	bedrock	222.074	2.99149	3.3103	0.48583
		bedrock	212.411	3.41354	3.16556	0.592376
		bedrock	216.723	2.20439	5.00119	0.537886
		bedrock	218.139	2.74454	2.9285	0.54938
		bedrock	214.92	2.78165	2.38804	0.480441
		bedrock	218.799	2.81061	2.46579	0.55261
		bedrock	216.21	2.83388	2.86893	0.530897
		bedrock	217.947	2.36328	2.98017	0.567153
		bedrock	214.878	2.36224	4.37109	0.61048
		bedrock	214.854	2.7887	3.42994	0.456812
		bedrock	215.868	2.62052	3.11465	0.554417
		bedrock	212.532	2.68738	2.7253	0.483018
		bedrock	214.54	2.60549	2.8967	0.465066
		bedrock	220.045	2.50846	3.61293	0.417426
		bedrock	217.544	2.84884	2.52948	0.506709
		bedrock	211.614	2.20553	5.17496	0.760329
		bedrock	213.789	2.73446	2.99813	0.677136
		bedrock	213.907	2.16652	2.3145	0.561494
	FO 06 93	bedrock	218.936	2.29399	1.31204	0.778355
		bedrock	220.204	2.31551	2.26876	1.37982
		bedrock	212.591	4.46549	1.77542	1.16752
		bedrock	213.894	3.41446	2.85306	1.48593
		bedrock	214.085	2.80565	0.955015	1.45056
		bedrock	215.046	2.29293	2.49756	1.13214
		bedrock	214.066	2.25673	0.98013	0.919864
		bedrock	211.553	2.29616	2.68828	1.09675
		bedrock	221.105	2.40041	1.65096	0.955258
		bedrock	214.723	2.37622	2.19887	1.026
		bedrock	213.288	2.73285	2.31752	1.09676
		bedrock	216.744	2.85432	0.28036	0.88449
Jones et al., 2015
	RJ11A18	bedrock	278.7	5.5	3	1
		bedrock	282	6.1	2.3	0.9
		bedrock	270.8	5.7	2.5	1
		bedrock	282.6	5.8	2.6	0.8
		bedrock	278.1	7.5	2.7	0.9
		bedrock	283.5	5.9	2.2	0.9
		bedrock	278.8	6.3	1.5	0.9
	RJ11A20	bedrock	268.1	5.7	0.2	0.9
		bedrock	268.3	6	-1.6	1
		bedrock	277.5	6.1	-1.3	1
		bedrock	269.6	7	1.2	1.2
		bedrock	270.7	5.9	-1.1	1.4
		bedrock	265.5	6	0.5	1
	MQ39	bedrock	270.9	7.6	-1	1.2
		bedrock	269.3	7.3	0.6	0.8
		bedrock	271.6	6.2	1.1	1.1
		bedrock	273.6	6.5	-2.2	1
		bedrock	273.5	5.8	2.7	1.9
		bedrock	264.3	5.7	-0.6	1.2
		bedrock	271.1	7.7	-1	1.1
		bedrock	273.1	7.7	-1.2	1.2
	AM0862	bedrock	274.7	7.5	-0.8	0.9
		bedrock	263.9	7.7	-1.5	1.1
		bedrock	271.4	8	-2.1	0.9
		bedrock	266.8	7.3	0	1.1
		bedrock	270.6	8.4	-0.9	0.9
	AM0853	bedrock	261	6	2.9	1
		bedrock	265.1	5.8	2.3	1.7
		bedrock	262.1	5.6	4.2	1.4
		bedrock	266.8	5.6	2.4	1
		bedrock	264	5.8	1.9	1.2
		bedrock	261	6	1.2	1.2
		bedrock	263.2	5.8	1.5	1.4
	AM0855	bedrock	248.6	5.5	-0.6	0.6
		bedrock	248.9	6.2	-0.3	0.8
		bedrock	248.6	5.5	-0.6	0.8
	RJ1104	bedrock	217.3	4.2	1.5	0.7
		bedrock	222.8	4.3	1.7	0.6
		bedrock	218.2	6.2	0.7	1.1
		bedrock	217.2	4.9	1.9	0.6
		bedrock	223.2	4.5	1.7	0.6
		bedrock	224.9	4.2	1.3	0.6
		bedrock	230	5	2.1	0.6
		bedrock	222.1	6.1	2.5	1
	AM0812	bedrock	73.7	2.7	9	0.8
		bedrock	72.2	4.2	9.4	0.7
		bedrock	76.2	3.1	9.2	1.1
		bedrock	71.1	10.1	9.2	0.7
		bedrock	71.7	1.9	9.2	0.7
		bedrock	72.5	2	9	1
		bedrock	73.4	3.2	9	0.8
		bedrock	73.6	2.2	8.7	1
		bedrock	71.9	2	9.8	0.9
	AM0823	bedrock	70.4	1.6	9	0.7
		bedrock	70.9	2	8.4	0.9
	AM0824	bedrock	64.6	2	8.6	0.8
		bedrock	63.8	2	8.8	0.9
		bedrock	64.5	1.8	8.2	0.8
		bedrock	65.4	1.7	8.6	0.8
		bedrock	66.1	1.7	8.6	0.8
		bedrock	64.9	1.5	8	1
		bedrock	64.8	1.8	7.7	0.7
		bedrock	64.9	1.7	7.7	1
	AM0806	bedrock	65.7	1.6	8.8	0.7
		bedrock	65.9	1.8	8.3	0.9
		bedrock	65.4	1.7	9.4	0.7
		bedrock	70.2	1.7	8.4	0.7
		bedrock	63.7	1.7	9.5	0.7
		bedrock	65.2	1.5	8.9	0.8
		bedrock	62.7	1.9	9.2	0.8
		bedrock	63.3	1.8	8.6	0.8
	RJ1103	bedrock	64.4	2.1	9	0.7
		bedrock	64.3	1.8	9.5	0.5
		bedrock	66.2	1.5	8.9	0.7
		bedrock	64.6	1.4	8.7	0.6
		bedrock	64	1.3	8.7	0.8
		bedrock	64	1.6	8.7	0.7
	AM0826	bedrock	65.1	1.6	9	0.6
		bedrock	64.2	0.7	8.3	0.7
		bedrock	64.2	0.7	8.9	0.7
		bedrock	63.4	1.8	8.9	0.8
		bedrock	63.6	1.5	8.5	0.8
		bedrock	63.8	1.5	8.1	0.8
		bedrock	66.2	2.4	8.4	0.7
		bedrock	65.4	1.5	9	0.7
	AM0890	bedrock	65.1	1.6	8.7	0.8
		bedrock	58.7	1.4	9.3	0.8
	AM0822	bedrock	56	1.5	8.7	1.2
		bedrock	55.9	1.5	9.2	1.5
		bedrock	58.3	1.5	10.4	1.5
		bedrock	59.2	1.4	8.2	1.6
		bedrock	57.3	1.5	7.8	1.2
		bedrock	56.7	1.5	8.2	1.3
	AM0815	bedrock	67.3	1.7	9.5	0.7
		bedrock	68.6	2.2	9.1	0.6
		bedrock	57.9	2.1	9.4	0.9
		bedrock	64.1	1.5	9.3	0.8
		bedrock	63.3	1.9	8.8	0.5
		bedrock	53.4	1.5	9.6	0.8
		bedrock	54.7	1.6	9.8	0.8
		bedrock	55.3	1.7	9.1	0.8
		bedrock	54.3	1.7	8.9	0.8
		bedrock	55	1.7	9.3	0.6
	AM0816	bedrock	54	2.1	9.5	0.7
		bedrock	54.1	0.8	8.8	0.7
		bedrock	53.3	1.8	9.3	0.8
		bedrock	54.3	2.2	9.5	0.8
		bedrock	55	2.2	8.2	0.8
		bedrock	55.1	2	8.9	0.8
		bedrock	54.8	1.9	9.7	0.7
		bedrock	54	1.7	10	0.8
		bedrock	68.6	1.8	9.3	0.7
	RJ1105	bedrock	39.1	1.6	9	0.7
		bedrock	40.4	2.1	9.2	0.5
		bedrock	40.3	1.5	8.6	0.7
		bedrock	43.1	1.6	9.5	0.8
		bedrock	39.8	1.4	8.6	0.8
		bedrock	41.5	2	9.3	0.9
		bedrock	39.6	1.4	9.7	1
		bedrock	38.7	1.9	10	0.9
	RJ1101	bedrock	37.2	0.9	9.3	0.6
		bedrock	39.3	1.4	9.8	0.7
		bedrock	39.9	2	9.7	0.7
		bedrock	40.2	1.1	10.1	0.6
		bedrock	39.4	1.2	10.8	0.8
		bedrock	38.9	1	10.1	0.6
		bedrock	39.3	1.3	10.6	0.8
		bedrock	38.2	0.9	9.9	0.6
		bedrock	40.5	1.6	9.9	0.8
	AM0867	bedrock	36.3	1.2	1.9	0.6
		bedrock	36.1	1.2	3	0.7
		bedrock	171.8	8.2	0.3	0.7
		bedrock	34.5	1.4	3	0.9
		bedrock	35.6	0.8	2.5	0.8
	AM0846	bedrock	25.9	0.7	3.1	0.9
		bedrock	158	4.9	2.9	0.6
		bedrock	28	0.8	1.7	0.7
		bedrock	26.1	1.6	4.3	1.1
		bedrock	26.1	1.6	3.3	0.6
		bedrock	25.9	1.1	0.2	0.8
		bedrock	24.6	0.9	2.9	0.9
	MQ153	bedrock	25.6	0.5	1.1	1
		bedrock	25.4	0.8	2.8	1
		bedrock	25.5	1.2	1	1
		bedrock	24.5	0.7	1.6	0.8
		bedrock	24.9	0.7	2.9	0.9
		bedrock	25.8	0.6	1.8	0.9
	AM0845	bedrock	25.4	0.9	4.8	1
		bedrock	278.5	5.9	-1	0.6
		bedrock	24.5	0.9	3.6	0.9
		bedrock	24.7	1.3	4.8	1.1
		bedrock	25.2	0.7	3.7	1.2
		bedrock	25.1	0.7	2.9	1.3
		bedrock	276.7	5.8	-0.3	1
		bedrock	23.8	0.8	3.1	0.9
	AM0860	bedrock	24.7	0.9	2.8	1
		bedrock	25.3	0.9	4.3	0.9
		bedrock	24.9	0.4	4.2	0.9
		bedrock	24.9	0.9	2.6	1.3
		bedrock	25.1	0.7	3.8	1.2
	ZN122	bedrock	25	1.3	1.4	1
		bedrock	24.4	1.1	1.1	0.9
		bedrock	24.8	0.9	2.2	1.1
		bedrock	25.6	0.9	2.4	1
		bedrock	25.7	0.8	1.8	0.9
	AM0844	bedrock	24.3	0.7	2.3	0.9
		bedrock	24.5	1.4	2.6	1
		bedrock	241	5.3	4.5	0.8
		bedrock	24.9	0.7	2.9	0.9
		bedrock	25.5	1.1	3	1.4
		bedrock	24.8	0.6	3.6	0.9
		bedrock	24.7	0.3	3.2	1
		bedrock	24.3	0.7	2.8	1
	AM0849	bedrock	24.8	0.8	4.1	1.3
		bedrock	24.4	1	2.8	0.9
		bedrock	25.4	0.7	4.4	0.9
		bedrock	24.5	1.1	3.2	0.9
		bedrock	24.1	1.1	3.8	1
		bedrock	24.7	0.4	4.1	1.3
	RF64	bedrock	24.6	0.7	4.1	1
		bedrock	23.3	0.8	4	1.4
		bedrock	23.9	0.8	4.1	1.3
		bedrock	24.5	0.6	4.5	1.8
		bedrock	23.7	0.7	3.6	0.9
		bedrock	388.1	10.5	-3.6	1.1
	PC14	bedrock	23.4	0.5	-1.6	1.2
		bedrock	23.5	0.6	-2.3	0.8
		bedrock	23.8	0.5	-0.5	1.1
		bedrock	23.6	0.5	-1.2	0.9
		bedrock	23	0.6	-3	0.8
		bedrock	23.4	0.5	-3	1
		bedrock	23.7	0.6	-2.2	1.1
	Z27	bedrock	23.5	0.6	1.2	1.2
		bedrock	23.6	0.9	1.7	1
		bedrock	23.4	0.9	2.5	1.3
		bedrock	23.2	1	2.7	0.8
		bedrock	23.5	1.2	0.7	0.9
		bedrock	23	0.9	4.2	1
		bedrock	22.4	0.9	2.1	0.8
		bedrock	22.8	0.9	2.3	1.1
	RJ11A5	bedrock	22.8	0.5	1.3	0.9
		bedrock	257.5	5.9	-1.8	0.7
		bedrock	22.7	0.6	4.1	0.8
		bedrock	22.3	0.7	-1.2	1
		bedrock	273.1	7.2	-0.7	1.3
		bedrock	22.5	0.8	2.1	1.3
	RJ11A10	bedrock	22.1	0.8	-2.4	0.7
		bedrock	22.2	0.5	-2.8	0.8
		bedrock	22.1	0.5	-3.1	0.5
		bedrock	22.1	0.6	-3.2	0.6
		bedrock	22.6	0.5	-2.3	0.6
		bedrock	22.1	0.6	-1.6	0.8
		bedrock	21.9	0.9	-3	0.7
	RJ11A11	bedrock	21.8	0.6	-1.8	0.8
		bedrock	21.6	0.8	-2.4	1
		bedrock	21.9	0.8	-2.4	0.8
	RJ11A14	bedrock	20.3	0.7	-0.9	0.9
		bedrock	138.1	5.2	-4.3	1.6
		bedrock	20.7	0.9	-3.1	0.8
		bedrock	20.7	0.7	-1	0.7
		bedrock	21	0.9	-2.2	0.6
		bedrock	20.3	0.7	-2.7	0.8
		bedrock	20.2	0.7	-3.2	0.9
	1026	bedrock	18.5	0.6	0.2	0.9
		bedrock	18.5	0.8	0.6	0.7
		bedrock	18.2	0.8	1.2	0.8
		bedrock	18.5	0.7	-0.5	0.8
		bedrock	18.4	0.7	1.6	0.6
		bedrock	17.7	1	1.1	0.8
		bedrock	19.1	1.6	2.4	0.9
		bedrock	17.5	0.6	1.4	0.8
	SP80	bedrock	18.1	0.7	0.5	0.9
		bedrock	18.1	0.4	0.8	0.8
		bedrock	18.4	1.3	1.7	0.9
		bedrock	18	0.7	1.2	0.8
		bedrock	17.6	0.8	0.4	0.9
		bedrock	18.1	0.4	1.5	0.9
	RF62	bedrock	17.4	0.5	2.3	0.9
		bedrock	17.7	0.6	2.5	1
		bedrock	17	0.6	2.6	0.9
		bedrock	17.3	0.7	1.9	0.9
		bedrock	17.1	0.6	2	0.9
		bedrock	16.2	0.4	1.7	1
	RJ11A7	bedrock	11.5	0.4	1	0.7
		bedrock	11.6	0.3	1.5	0.6
		bedrock	11.7	0.2	0.9	0.7
		bedrock	11.9	0.5	1.1	0.6
		bedrock	11.7	0.2	1.2	0.5
		bedrock	11.6	0.4	0.5	0.8
	RJ11A17	bedrock	239.7	5.9	-3.1	0.6
		bedrock	8.8	0.5	-3.9	1
	RJ11A15	bedrock	9.3	0.5	-3.9	0.6
		bedrock	9.2	0.7	-3.6	0.6
		bedrock	9.4	0.2	-3.5	0.7
		bedrock	249	5.2	3.6	0.7
		bedrock	9.8	0.4	-3.6	0.6
		bedrock	9.3	0.4	-3.8	0.9
		bedrock	9.4	0.4	-2.7	0.8
	MQ33	bedrock	6.3	0.2	-1	0.7
		bedrock	6.1	0.2	-1.1	0.8
		bedrock	6.2	0.2	-1.7	0.9
		bedrock	6	0.1	-1.3	0.6
		bedrock	9.8	0.3	0.2	0.8
		bedrock	15.1	0.4	1.2	0.8
		bedrock	6	0.2	-1.4	0.9
		bedrock	255.7	5.4	1.1	0.9
	DI095	bedrock	6.2	0.3	-1.5	1
		bedrock	256.3	6.8	4.1	1.2
		bedrock	6	0.2	-3.4	0.9
		bedrock	6.2	0.3	1	1.1
		bedrock	6	0.2	-1.3	0.8
		bedrock	270.7	6	2.2	1.1
		bedrock	6.3	0.2	-1.2	0.8
		bedrock	6.4	0.2	-2.5	1.2
		bedrock	6.2	0.3	-0.2	1.1
Dahlquist et al., 2016
	GUA-1	bedrock	526		-4.76
		bedrock	529		-3.32
		bedrock	525		-1.98
		bedrock	543		-2.13
		bedrock	526		-0.84
		bedrock	540		-0.97
		bedrock	527		-0.12
		bedrock	536		-1.89
Ortamendi et al., 2017
	GCB1-1	bedrock	471.3	6.2	-3.7
	GCB1-2	bedrock	501.1	3.3	-5.6
	GCB1-6	bedrock	478.7	6.8	-3.9
	GCB1-3	bedrock	461.6	5.8	-5.9
	GCB1-7	bedrock	494.8	7.1	-4
	GCB1-8	bedrock	486.2	9.7	-3.7
	GCB1-16	bedrock	453.6	18.9	-3.6
	GCB1-21	bedrock	462.4	10.3	-4.6
	PG2-3	bedrock	457.2	12.2	-3.8
	PG2-6	bedrock	470.3	5.3	-2.4
	PG2-10	bedrock	477.7	12.5	-1.2
	PG2-12	bedrock	479.3	13.8	-0.6
	PG2-16	bedrock	484.2	6.8	-0.4
	PG2-20	bedrock	474.8	19.1	-2.1
	PG2-23	bedrock	468.8	7.5	-5.3
	GUS3-2	bedrock	467.8	8.8	-2.13
	GUS3-3	bedrock	492.5	14.5	-2.33
	GUS3-7	bedrock	466.5	17.9	-3.09
	GUS3-13	bedrock	460.6	8.3	-4.95
	GUS3-19	bedrock	497.9	15	-3.12
	GUS3-20	bedrock	447.5	17.9	-5.14
	GUS3-23	bedrock	463.4	12.6	-7.64
	GUS3-24	bedrock	457	8.2	-8.36
	GVF58-3	bedrock	503.4	13.9	-0.89
	GVF58-4	bedrock	480.6	5.7	-3.29
	GVF58-6	bedrock	466.9	5.1	-4.5
	GVF58-8	bedrock	472.7	8.9	-4.53
	GVF58-11	bedrock	463.6	15.6	-3.08
	GVF58-17	bedrock	475.5	6.5	-5.12
	GVF58-19	bedrock	442.9	13.3	-8.72
Rapela et al., 2018
	LCA142, Sierras de Córdoba, Güiraldes leucotonalite (TTG suite), 470 ± 3 Ma	bedrock	526.563	7.29881	-3.00879
		bedrock	470.951	12.6489	-14.509
		bedrock	481.296	5.20758	-2.6752
		bedrock	465.618	5.1349	-2.9676
		bedrock	469.03	5.56241	-8.03238
		bedrock	465.393	5.55695	-1.84414
		bedrock	468.921	5.12596	-4.3836
		bedrock	473.095	5.39557	-4.40153
		bedrock	464.749	5.45033	-4.04052
		bedrock	464.749	5.45033	-6.79283
		bedrock	468.437	5.2755	-3.92199
		bedrock	469.64	5.38904	-4.29783
		bedrock	466.398	5.52079	-4.41843
		bedrock	472.558	5.16324	-3.76062
		bedrock	471.583	5.42225	-2.34633
		bedrock	472.213	5.45025	-4.42059
		bedrock	474.519	6.20284	-2.77702
		bedrock	476.593	5.37131	-4.62373
		bedrock	469.881	5.13061	-2.75365
		bedrock	467.806	5.41269	-2.81022
		bedrock	458.338	5.77591	-1.74543
		bedrock	469.862	5.74992	-1.97282
		bedrock	464.743	5.11137	-4.07665
	LCA143, Sierras de Córdoba, Güiraldes leucotonalite (TTG suite), 474 ± 3 Ma	bedrock	473.687	4.91935	-5.34428
		bedrock	470.16	5.24306	-1.73221
		bedrock	485.218	5.1096	-2.68358
		bedrock	484.284	5.13574	-2.3288
		bedrock	476.15	4.9763	-4.88379
		bedrock	474.219	5.38333	-2.446
		bedrock	465.842	5.70273	-3.13164
		bedrock	474.062	5.35996	-3.05831
		bedrock	471.949	5.00764	-3.90947
		bedrock	472.097	5.01893	-3.05487
		bedrock	469.352	4.97425	-3.65035
		bedrock	477.797	4.99249	-2.67509
		bedrock	476.338	5.1312	-2.43264
		bedrock	476.901	5.04167	-3.13117
		bedrock	469.175	5.11254	-2.72888
		bedrock	476.434	5.65939	-2.05664
	SCS184, Sierras de Córdoba, San Agustín trondhjemite (TTG suite), 482 ± 4 Ma	bedrock	479.086	4.94098	5.77831
		bedrock	491.137	5.33847	1.33365
		bedrock	502.896	5.09248	7.8011
		bedrock	499.857	9.50272	6.24091
		bedrock	469.653	5.6158	5.12114
		bedrock	466.906	4.88269	0.825263
		bedrock	457.727	4.72126	9.05682
		bedrock	528.104	6.44143	-6.38195
		bedrock	495.248	6.03878	8.28353
		bedrock	460.958	4.72932	9.04782
		bedrock	522.139	5.70667	-2.68515
		bedrock	513.567	5.34909	-5.30587
		bedrock	488.214	5.35711	10.1642
		bedrock	493.173	5.03959	-3.29161
		bedrock	470.855	7.18143	-1.29275
	LPL150, Sierras de Córdoba, La Playa granodiorite (TTG suite), 469 ± 4 Ma	bedrock	462.5	4.84056	3.57313
		bedrock	465.4	4.94441	1.00698
		bedrock	469.7	4.91141	6.84256
		bedrock	461.5	4.82187	3.67596
		bedrock	512.4	5.41438	5.40728
		bedrock	471.5	4.85596	7.3344
		bedrock	423.2	4.71339	6.33846
		bedrock	470.8	5.24887	5.0175
		bedrock	484.6	5.42	8.11873
		bedrock	476.8	5.49545	6.55443
	TUA1029, Sierra de Chepes, Tuani peraluminious cordierite monzogranite, 486 ± 7 Ma	bedrock	481.561	5.17818	-4.42704
		bedrock	483.311	5.18721	-3.06479
		bedrock	493.308	5.55741	-2.97457
		bedrock	486.017	5.6616	-6.73278
		bedrock	479.513	6.02597	-4.63299
	TUA1028, Sierra de Chepes, Tuani metaluminous leucogranite, 482 ± 3 Ma	bedrock	483.547	5.95479	-5.68238
		bedrock	501.682	6.88011	-5.52281
		bedrock	482.275	4.99086	-6.01087
		bedrock	485.758	5.37968	-3.05514
		bedrock	476.659	5.12429	-4.79739
		bedrock	482.199	5.8645	-2.76134
		bedrock	473.869	5.22469	-4.34662
		bedrock	485.977	5.8121	-6.57472
		bedrock	480.219	5.74947	-4.26398
		bedrock	484.623	5.14072	-1.5435
		bedrock	495.514	5.48167	-2.73914
		bedrock	476.374	5.15273	-3.78237
		bedrock	475.3	7.3	-4.9156
	VEL1026, Sierra de Velasco, La Puerta perluminous monzogranite, 482 ± 3 Ma	bedrock	480.322	5.19605	-2.01235
		bedrock	484.312	5.33874	-4.20877
		bedrock	484.455	5.95795	-4.92659
		bedrock	481.623	5.27279	-3.46883
		bedrock	492.286	5.61943	-4.59814
		bedrock	467.525	5.26448	-5.86014
		bedrock	481.295	5.26593	-5.0874
		bedrock	490.41	5.28728	-4.10657
		bedrock	482.766	5.08559	-3.84528
		bedrock	489.643	5.26177	-3.99741
		bedrock	487.124	5.48475	-4.38622
		bedrock	481.966	5.12128	-4.2887
		bedrock	488.151	5.43022	-2.46373
		bedrock	480.526	5.10177	-5.26044
		bedrock	481.788	5.0764	-4.51326
		bedrock	475.199	5.43081	-4.17237
		bedrock	480.668	5.33963	-4.52698
	VEL3000, Sierra de Velasco, cordierite monzogranite, 481 ± 3 Ma	bedrock	489.727	5.37912	-6.98772
		bedrock	478.427	6.94095	-5.94979
		bedrock	478.77	5.50833	-23.3466
		bedrock	482.17	5.60012	-5.41389
		bedrock	476.084	5.16129	-4.62111
		bedrock	473.984	5.30868	-4.72191
		bedrock	470.627	6.51897	-5.40563
		bedrock	475.927	5.71306	-6.54509
		bedrock	481.49	6.86863	-4.29535
		bedrock	481.635	5.35295	-4.23966
		bedrock	483.859	7.04234	-3.31932
		bedrock	473.98	7.07257	-3.78503
		bedrock	485.164	5.64363	-5.19776
		bedrock	462.84	6.81192	-4.21601
		bedrock	480.807	5.5266	-4.98883
		bedrock	471.807	6.85823	-4.97123
		bedrock	471.421	5.5681	-4.39056
		bedrock	458.383	8.64577	-4.27906
		bedrock	478.684	5.65864	-5.95126
	ANT08, Sierra de Antinaco, Las Cañadas peraluminous monzogranite, 475 ± 3 Ma	bedrock	482	6	-4.305
		bedrock	472	8	-1.23385
		bedrock	473	6	-9.25133
		bedrock	473	6	-9.11032
		bedrock	481	6	-3.75699
		bedrock	470	6	0.1436
		bedrock	475	7	-1.92114
		bedrock	469	6	-4.85702
		bedrock	472	7	-2.47506
		bedrock	477	6	-5.47043
		bedrock	469	6	-3.54955
		bedrock	476	6	-6.99718
		bedrock	482	5	-4.97961
		bedrock	472	5	-4.25044
		bedrock	471	5	-5.56484
		bedrock	482	5	-5.77623
		bedrock	477	5	-4.45008
		bedrock	475	6	-5.29407
		bedrock	475	5	-6.46535
		bedrock	482	5	-5.89083
		bedrock	474	6	-7.62638
	CAP1021, Sierra de Capillitas, peraluminous monzogranite, 474 ± 3 Ma	bedrock	471.961	5.29352	-4.02795
		bedrock	482.057	5.6274	-1.12811
		bedrock	486.709	5.32945	-5.25547
		bedrock	467.289	5.29263	-4.70889
		bedrock	459.212	6.15745	-4.73705
		bedrock	480.448	5.20486	-4.63148
		bedrock	467.43	5.05117	0.753936
		bedrock	471.626	4.97401	-2.21954
		bedrock	466.949	5.02581	-4.03298
		bedrock	480.955	5.09791	-4.48028
		bedrock	477.061	5.01256	-3.86274
		bedrock	474.405	4.90751	-8.73462
		bedrock	480.847	5.22204	-1.64936
		bedrock	460.953	5.16712	-11.6447
		bedrock	477.797	5.66458	-2.90285
	BEL07, Belén, peraluminous monzogranite, 472 ± 4 Ma	bedrock	465	8	-25.9791
		bedrock	459	8	-21.5484
		bedrock	463	9	-23.0611
		bedrock	463	8	-22.9392
		bedrock	490	9	-19.4177
		bedrock	463	9	-18.2548
		bedrock	470	8	-17.7752
		bedrock	466	9	-20.0845
		bedrock	491	9	-24.3099
		bedrock	470	8	-19.56
	NAC256, Sierra de Chepes, Nacate metaluminous granodiorite, 474 ± 3 Ma	bedrock	490.8	5.5	-7.35009
		bedrock	469.3	5	-1.44881
		bedrock	481.3	5.3	-6.50762
		bedrock	490.5	5.5	-3.91489
		bedrock	473.7	5	-7.26058
		bedrock	471.2	5	-5.43937
		bedrock	474.4	5.2	-6.12454
		bedrock	468.5	5.4	-7.19466
		bedrock	477.5	5	-8.37273
		bedrock	488.2	5.4	-7.33343
		bedrock	477.5	5	-6.37153
		bedrock	467	4.8	-4.77672
	RLC236, Sierra de Chepes, Río de las Cañas metaluminous tonalite, 469 ± 4 Ma	bedrock	467.364	5.50005	-6.25953
		bedrock	466.844	4.98499	-5.29055
		bedrock	457.933	5.34914	-7.88042
		bedrock	472.461	5.39408	-6.17273
		bedrock	468.835	5.38402	-6.44969
		bedrock	478.867	7.58998	-6.15066
		bedrock	468.034	5.70403	-7.42321
		bedrock	454.979	5.6415	-4.52313
		bedrock	467.177	5.38491	-3.90023
		bedrock	467.396	5.37943	-5.73264
		bedrock	470.817	5.52056	-6.4905
		bedrock	463.132	5.43395	-6.45731
		bedrock	476.968	5.62422	-7.07782
		bedrock	458.388	5.03388	-5.5553
	CHA3008, Sierra de Las Planchadas, Chaschuil rhyolite, 468 ± 3 Ma	bedrock	467.588	5.43839	2.71727
		bedrock	470.28	5.73805	4.45713
		bedrock	469.665	6.27844	3.69448
		bedrock	460.271	5.11905	2.93808
		bedrock	469.431	5.72196	4.26359
		bedrock	465.211	5.39825	3.7547
		bedrock	464.07	5.33246	4.31476
		bedrock	471.379	6.1559	3.0606
		bedrock	471.069	6.2211	5.09857
		bedrock	473.765	5.33139	2.87101
		bedrock	469.354	5.43969	4.25869
		bedrock	466.397	5.23758	3.01504
		bedrock	472.252	5.6385	3.83481
		bedrock	467.203	5.3727	4.72442
		bedrock	469.732	5.31727	4.02756
	MIR1014, Sierra de Famatina, Nuñorco metaluminous monzongranite, 478 ± 4 Ma	bedrock	472.93	5.02798	-0.579847
		bedrock	469.119	7.20553	-2.09529
		bedrock	477.188	5.01564	-1.72192
		bedrock	478.581	4.87175	-1.53815
		bedrock	471.636	5.63744	-3.27332
		bedrock	483.899	5.24292	-2.4417
		bedrock	471.223	5.06951	-2.23556
		bedrock	478.186	5.36031	-4.08996
		bedrock	467.051	5.2498	-4.26942
		bedrock	487.536	6.47003	-3.14269
		bedrock	464.085	7.80627	-3.18642
		bedrock	480.409	7.69665	-1.65637
	SVF577, Sierra de Valle Fértil, metaluminous gabbro-diorite, 472 ± 5 Ma	bedrock	467.97	7.67803	-2.40802
		bedrock	469.899	6.36848	-3.48376
		bedrock	485.889	9.07747	-3.70378
		bedrock	477.489	8.38741	-2.97833
		bedrock	468.84	5.33487	-3.24084
		bedrock	501.058	10.64	-4.41494
		bedrock	477.006	7.21094	-3.85545
		bedrock	483.518	7.21456	-4.44689
		bedrock	470.447	9.38438	-5.25903
		bedrock	473.437	5.58684	-3.99831
		bedrock	498.429	6.99464	-3.72545
		bedrock	471.871	7.46681	-5.18198
		bedrock	479.413	5.56974	-2.92506
		bedrock	468.574	5.25851	-3.61082
		bedrock	467.574	7.13279	-4.15908
		bedrock	474.822	5.13549	-4.53179
		bedrock	471.275	5.46779	-2.4906
		bedrock	471.347	6.57164	-3.64965
	SVF508, Sierra de Valle Fértil, metaluminoous tonalite, 474 ± 3 Ma	bedrock	474.773	5.72728	-3.36101
		bedrock	458.254	6.2809	-3.55358
		bedrock	474.167	5.58333	-3.01394
		bedrock	476.916	5.83866	-2.38858
		bedrock	467.986	5.31368	-3.06555
		bedrock	479.376	8.09527	-2.53457
		bedrock	475.715	5.61061	-1.37036
		bedrock	480.576	5.21734	-3.96876
		bedrock	465.728	6.18851	-4.07636
		bedrock	478.089	5.72442	-3.48483
		bedrock	473.402	5.19158	-3.69832
		bedrock	469.22	5.46376	-4.30655
		bedrock	563.112	6.73895	-2.67097
		bedrock	473.133	5.64594	-5.45407
		bedrock	467.568	5.09684	-5.62666
		bedrock	490.928	5.12779	-2.01572
	SPP6093, Difunta Correa, mylonitised peraluminous leucogranite, 469 ± 9 Ma	bedrock	465.825	4.61234	-1.46991
		bedrock	463.19	4.34193	-3.59821
		bedrock	478.707	4.5579	1.16965
		bedrock	455.89	4.82438	-2.25826
		bedrock	464.905	4.3949	-0.138677
		bedrock	440.597	4.79944	0.126263
		bedrock	427.298	4.63519	-4.27968
		bedrock	476.054	4.51473	3.01784
	PIM113, Río Colorado, Pichi Mahuida perlauminous granodiorite, 474 ± 6 Ma	bedrock	459.714	4.26072	-5.55074
		bedrock	476.601	6.10997	-5.52163
		bedrock	468.878	5.57958	-5.09918
		bedrock	469.292	4.91316	-5.97208
		bedrock	474.745	4.82831	-5.54618
		bedrock	477.64	4.33228	-5.21718
		bedrock	487.939	5.82527	-4.81598
		bedrock	468.369	4.64529	-3.9648
	SGR019, Sierra Grande area, Playas Doradas metaluminous granodiorite, 476 ± 4 Ma	bedrock	480.662	5.48502	0.583381
		bedrock	474.867	5.25118	0.394046
		bedrock	469.877	5.27904	-2.18737
		bedrock	478.928	5.10302	0.958532
		bedrock	471.462	5.22525	-1.00428
		bedrock	481.516	5.74839	-0.387021
		bedrock	478.815	5.89175	-1.22463
		bedrock	476.282	5.65164	-0.870919
		bedrock	468.869	5.08999	0.64752
		bedrock	465.317	5.57115	0.0387507
		bedrock	476.995	5.33338	0.706663
		bedrock	470.176	5.60956	-1.29321
		bedrock	481.626	5.36465	-0.944564
		bedrock	476.685	6.06081	-0.818762
		bedrock	483.054	5.43574	-0.432841
	SGR035, Sierra Grande metaluminous monzogranite, 476 ± 6 Ma	bedrock	485.052	5.82304	-0.973901
		bedrock	489.01	9.68269	-0.881304
		bedrock	481.407	8.09587	-1.70245
		bedrock	471.727	5.64851	-2.85295
		bedrock	486.863	5.93734	-0.312949
		bedrock	482.218	6.02802	1.36036
		bedrock	480.698	6.19528	-0.31171
		bedrock	469.968	5.77343	-1.40217
		bedrock	487.452	5.73219	-1.77987
		bedrock	503.479	6.75837	0.0226945
		bedrock	485.6	7.97656	-0.661958
		bedrock	495.792	5.9163	-3.64809
		bedrock	496.58	5.81776	-2.47998
		bedrock	506.776	6.43887	-0.572111
		bedrock	499.653	6.76654	-1.36109
	TAL6071, Precordillera, Talacasto section, San Juan Formation, K-bentonite, 470 ± 3 Ma	bedrock	461.1	4.62673	-2.69359
		bedrock	474.615	6.73133	-3.23967
		bedrock	470.602	4.73233	-2.50551
		bedrock	479.12	5.08807	-1.90843
		bedrock	463.723	4.65817	-2.34285
		bedrock	469.301	4.55855	-2.62132
		bedrock	464.616	5.87699	-1.56043
		bedrock	466.556	4.11265	-2.15902
		bedrock	479.376	4.81538	-3.67833
		bedrock	471.515	4.44452	1.90551
		bedrock	464.977	6.4205	-2.05084
	TAL6073, Precordillera, Talacasto section, San Juan Formation, K-bentonite, 470 ± 3 Ma	bedrock	464.776	5.15421	-0.668703
		bedrock	474.152	5.9233	-2.72681
		bedrock	468.948	5.60458	-0.806427
		bedrock	465.003	5.06599	-3.05665
		bedrock	462.213	4.35807	-4.63861
		bedrock	465.981	5.48426	-1.55013
		bedrock	471.141	5.04942	-3.6826
		bedrock	468.63	5.2437	-1.02557
		bedrock	463.255	4.98973	-2.4143
		bedrock	474.727	4.87819	1.49211
		bedrock	467.927	5.72715	-1.68577
		bedrock	521.756	4.99823	-5.47958
		bedrock	475.509	5.10957	-2.75775
		bedrock	476.685	8.43657	-2.87348
		bedrock	475.101	4.87418	-2.45205
Dahlquist et al., 2018
	SLA-1	bedrock	356		3.12
		bedrock	356		0.47
		bedrock	356		7.35
		bedrock	356		9.11
		bedrock	356		5.36
		bedrock	356		4.69
		bedrock	356		0.5
		bedrock	356		2.67
		bedrock	356		3.15
		bedrock	356		2.34
	SRP-2	bedrock	336		-3.41
		bedrock	336		-3.25
		bedrock	336		-1.65
		bedrock	336		-5.06
		bedrock	336		-2.7
		bedrock	336		0.44
		bedrock	336		-6.09
		bedrock	336		-3.01
		bedrock	336		-4
		bedrock	336		-4.78
		bedrock	336		-2.55
	BAL-13	bedrock	349		3.7
		bedrock	349		-0.92
		bedrock	349		3.66
		bedrock	349		9.29
		bedrock	349		2.81
	VIL-6	bedrock	329		-1.52
		bedrock	329		-1.7
		bedrock	329		-1.23
		bedrock	329		2.84
		bedrock	329		-10.35
		bedrock	329		-6.63
		bedrock	329		-24.88
	QUI-7	bedrock	328		-4.72
		bedrock	328		-6.63
		bedrock	328		-4.3
		bedrock	328		-2.6
		bedrock	328		-4.26
		bedrock	328		-3.85
		bedrock	328		-5.35
		bedrock	328		-5.32
		bedrock	328		-6.25
		bedrock	328		-3.86
		bedrock	328		-5.99
	SV-5	bedrock	342		-2.87
		bedrock	371		-9.32
		bedrock	371		-5.05
		bedrock	371		-5.33
		bedrock	342		-9.46
		bedrock	371		-7.86
		bedrock	371		-5.93
		bedrock	342		-3.38
		bedrock	342		-6.33
		bedrock	371		-8.61
		bedrock	342		-3.76
	BON-9	bedrock	342		5.49
		bedrock	342		7.11
		bedrock	342		4.48
		bedrock	342		4.37
		bedrock	342		0.52
		bedrock	342		5.05
		bedrock	342		1.27
		bedrock	342		6.14
		bedrock	342		4.57
		bedrock	342		4.04
		bedrock	342		2.37
	POT-118A	bedrock	353		2.07
		bedrock	353		0.37
		bedrock	353		0.81
		bedrock	353		5.85
		bedrock	353		12.64
		bedrock	353		6.78
		bedrock	353		4.29
		bedrock	353		4.73
		bedrock	353		6.19
		bedrock	353		7.03
	POT-121A	bedrock	353		-23.28
		bedrock	353		-2.21
		bedrock	353		-4.27
		bedrock	353		-9.7
		bedrock	353		-11.26
		bedrock	353		-34.46
		bedrock	353		-14.55
		bedrock	353		-12.87
		bedrock	353		-18.53
		bedrock	353		-26.61
	UMA-30008	bedrock	357		9.84
		bedrock	357		8.63
		bedrock	357		7.86
		bedrock	357		6.83
		bedrock	357		5.41
		bedrock	357		14.2
		bedrock	357		5.22
		bedrock	357		5.1
		bedrock	357		5.87
	VEL-12	bedrock	342		-17.32
		bedrock	342		-10.08
		bedrock	342		-6.75
		bedrock	342		-7.14
		bedrock	342		-8.1
		bedrock	342		-1.75
		bedrock	342		-6.09
		bedrock	342		-5.99
		bedrock	342		-4.17
		bedrock	342		-2.67
	TAB-11	bedrock	322		4.11
		bedrock	322		1.65
		bedrock	322		2.11
		bedrock	322		-0.39
		bedrock	322		-0.21
		bedrock	322		3.66
		bedrock	322		4.48
		bedrock	322		0.75
		bedrock	322		-2
		bedrock	322		-0.73
		bedrock	322		-0.4
